# Supplementary material for: Molnupiravir When Used Alone Seems to Be Safe and Effective as Outpatient COVID-19 Therapy for Hemodialyzed Patients and Kidney Transplant Recipients
Source: MDPI journal article supplement (doi:10.3390/v14102224), 2022-10-09
Supplement: s1 [file s1]

|                                                                                    |                                                                                                                                                                                                                                                                                                                                                                                                                                                                                                                                                                                                                                                                                                                     |                                                                                                                                                                                                                                                                                                                                                                                                                                                                                                                                                                                                                                 |
|------------------------------------------------------------------------------------|---------------------------------------------------------------------------------------------------------------------------------------------------------------------------------------------------------------------------------------------------------------------------------------------------------------------------------------------------------------------------------------------------------------------------------------------------------------------------------------------------------------------------------------------------------------------------------------------------------------------------------------------------------------------------------------------------------------------|---------------------------------------------------------------------------------------------------------------------------------------------------------------------------------------------------------------------------------------------------------------------------------------------------------------------------------------------------------------------------------------------------------------------------------------------------------------------------------------------------------------------------------------------------------------------------------------------------------------------------------|
| <b>DATE</b>                                                                        | .....                                                                                                                                                                                                                                                                                                                                                                                                                                                                                                                                                                                                                                                                                                               |                                                                                                                                                                                                                                                                                                                                                                                                                                                                                                                                                                                                                                 |
| <b>NAME</b>                                                                        | .....                                                                                                                                                                                                                                                                                                                                                                                                                                                                                                                                                                                                                                                                                                               |                                                                                                                                                                                                                                                                                                                                                                                                                                                                                                                                                                                                                                 |
| <b>GENDER</b>                                                                      | <input type="checkbox"/> Female <input type="checkbox"/> Male                                                                                                                                                                                                                                                                                                                                                                                                                                                                                                                                                                                                                                                       |                                                                                                                                                                                                                                                                                                                                                                                                                                                                                                                                                                                                                                 |
| <b>AGE</b>                                                                         | .....                                                                                                                                                                                                                                                                                                                                                                                                                                                                                                                                                                                                                                                                                                               |                                                                                                                                                                                                                                                                                                                                                                                                                                                                                                                                                                                                                                 |
| <b>BODY MASS</b>                                                                   | .....                                                                                                                                                                                                                                                                                                                                                                                                                                                                                                                                                                                                                                                                                                               |                                                                                                                                                                                                                                                                                                                                                                                                                                                                                                                                                                                                                                 |
| <b>HEIGHT</b>                                                                      | .....                                                                                                                                                                                                                                                                                                                                                                                                                                                                                                                                                                                                                                                                                                               |                                                                                                                                                                                                                                                                                                                                                                                                                                                                                                                                                                                                                                 |
| <b>ESRD underlying condition</b>                                                   | <input type="checkbox"/> Diabetic kidney disease<br><input type="checkbox"/> Hypertensive nephropathy<br><input type="checkbox"/> Glomerulonephritis<br><input type="checkbox"/> Cystic/hereditary<br><input type="checkbox"/> Unknown<br><input type="checkbox"/> Other: .....                                                                                                                                                                                                                                                                                                                                                                                                                                     |                                                                                                                                                                                                                                                                                                                                                                                                                                                                                                                                                                                                                                 |
| <b>Renal replacement therapy:</b>                                                  | <input type="checkbox"/> Hemodialysis<br>Start date: .....                                                                                                                                                                                                                                                                                                                                                                                                                                                                                                                                                                                                                                                          |                                                                                                                                                                                                                                                                                                                                                                                                                                                                                                                                                                                                                                 |
| <b>Concomitant diseases:</b>                                                       | <input type="checkbox"/> Myocardial infarction<br><input type="checkbox"/> Congestive heart failure<br><input type="checkbox"/> Peripheral vascular disease<br><input type="checkbox"/> Cerebrovascular accident<br><input type="checkbox"/> Transient ischemic attack<br><input type="checkbox"/> Dementia<br><input type="checkbox"/> Chronic obstructive pulmonary disease<br><input type="checkbox"/> Connective tissue disease<br><input type="checkbox"/> Peptic ulcer disease<br><input type="checkbox"/> Diabetes mellitus<br><input type="checkbox"/> uncomplicated<br><input type="checkbox"/> end-organ damage<br><input type="checkbox"/> Hemiplegia<br><input type="checkbox"/> Chronic kidney disease | <input type="checkbox"/> Liver disease<br><input type="checkbox"/> mild = chronic hepatitis (or cirrhosis without portal hypertension)<br><input type="checkbox"/> moderate = cirrhosis and portal hypertension but no variceal bleeding history<br><input type="checkbox"/> severe = cirrhosis and portal hypertension with variceal bleeding history<br><input type="checkbox"/> Solid tumor<br><input type="checkbox"/> localized<br><input type="checkbox"/> metastatic<br><input type="checkbox"/> Leukemia<br><input type="checkbox"/> Lymphoma<br><input type="checkbox"/> AIDS<br><input type="checkbox"/> Other: ..... |
| <b>Kidney transplantation</b>                                                      | Date: .....<br>Donor <input type="checkbox"/> Living donor<br><input type="checkbox"/> Deceased donor<br>Serum creatinine prior to COVID-19: .....                                                                                                                                                                                                                                                                                                                                                                                                                                                                                                                                                                  |                                                                                                                                                                                                                                                                                                                                                                                                                                                                                                                                                                                                                                 |
| <b>Immunosuppressive regimen prior to COVID-19:</b>                                | <input type="checkbox"/> Steroids<br><input type="checkbox"/> Tacrolimus<br><input type="checkbox"/> Cyclosporine A<br><input type="checkbox"/> MMF/MPA<br><input type="checkbox"/> Azathioprine<br><input type="checkbox"/> Sirolimus<br><input type="checkbox"/> Everolimus                                                                                                                                                                                                                                                                                                                                                                                                                                       |                                                                                                                                                                                                                                                                                                                                                                                                                                                                                                                                                                                                                                 |
| <b>Immunosuppressive regimen modification after onset of SARS-CoV-2 infection:</b> | <input type="checkbox"/> Dose reduction<br>Drug name: .....<br>Dose prior to reduction.....<br>Dose after reduction.....<br><input type="checkbox"/> Drug withdrawal<br>Drug name: .....<br><input type="checkbox"/> Other: .....                                                                                                                                                                                                                                                                                                                                                                                                                                                                                   |                                                                                                                                                                                                                                                                                                                                                                                                                                                                                                                                                                                                                                 |

|                                                     |                                                                                                                                                                                                                                                                                                                                                                                                                                                                                                                                                                                                                                                                                                                                                                                                                                                                                                                                                                                                                          |  |
|-----------------------------------------------------|--------------------------------------------------------------------------------------------------------------------------------------------------------------------------------------------------------------------------------------------------------------------------------------------------------------------------------------------------------------------------------------------------------------------------------------------------------------------------------------------------------------------------------------------------------------------------------------------------------------------------------------------------------------------------------------------------------------------------------------------------------------------------------------------------------------------------------------------------------------------------------------------------------------------------------------------------------------------------------------------------------------------------|--|
| <b>SARS-CoV-2 vaccinations (brand name, dates):</b> | <input type="checkbox"/> YES<br><input type="checkbox"/> 1 dose (date) ..... brand name .....<br><input type="checkbox"/> 2 doses (date) ..... brand name .....<br><input type="checkbox"/> 3 doses (date) ..... brand name.....<br><input type="checkbox"/> 4 doses (date) ..... brand name ..... <input type="checkbox"/> NO                                                                                                                                                                                                                                                                                                                                                                                                                                                                                                                                                                                                                                                                                           |  |
| <b>SARS-CoV-2 vaccinations (side effects):</b>      | <div style="display: flex; justify-content: space-between;"> <div style="width: 48%;"> <input type="checkbox"/> Pain at the injection site<br/>dose number(s):.....<br/> <input type="checkbox"/> Fatigue<br/>dose number(s):.....<br/> <input type="checkbox"/> Headache<br/>dose number(s):.....<br/> <input type="checkbox"/> Muscle aches<br/>dose number(s):.....<br/> <input type="checkbox"/> Arthralgia<br/>dose number(s):.....<br/> <input type="checkbox"/> Chills<br/>dose number(s):.....         </div> <div style="width: 48%;"> <input type="checkbox"/> Fever<br/>dose number(s):.....<br/> <input type="checkbox"/> Swelling at the injection site<br/>dose number(s):.....<br/> <input type="checkbox"/> Redness at the injection site<br/>dose number(s):.....<br/> <input type="checkbox"/> Nausea<br/>dose number(s):.....<br/> <input type="checkbox"/> Enlarged lymph nodes<br/>dose number(s):.....<br/> <input type="checkbox"/> Feeling unwell<br/>dose number(s):.....         </div> </div> |  |
| <b>COVID-19:</b>                                    | date of the symptoms onset: .....<br>symptoms duration (days): .....<br>date of the positive test: .....<br>hospitalization due to COVID-19 <input type="checkbox"/> YES <input type="checkbox"/> NO<br>oxygen therapy <input type="checkbox"/> YES <input type="checkbox"/> NO<br>minimal oxygen saturation (%).....                                                                                                                                                                                                                                                                                                                                                                                                                                                                                                                                                                                                                                                                                                    |  |
| <b>COVID-19: symptoms</b>                           | <input type="checkbox"/> anosmia<br><input type="checkbox"/> dyspnea<br><input type="checkbox"/> fever<br><input type="checkbox"/> cough<br><input type="checkbox"/> muscle and joint pain<br><input type="checkbox"/> weakness<br><input type="checkbox"/> diarrhea<br><input type="checkbox"/> dizziness<br><input type="checkbox"/> skin hyperalgesia<br><input type="checkbox"/> headaches<br><input type="checkbox"/> memory impairment<br><input type="checkbox"/> concentration problems                                                                                                                                                                                                                                                                                                                                                                                                                                                                                                                          |  |
| <b>MOLNUPIRAVIR THERAPY:</b>                        | date of distribution: .....<br>missed doses <input type="checkbox"/> YES <input type="checkbox"/> NO<br>if yes, why .....<br>premature therapy discontinuation:<br><input type="checkbox"/> WHEN: ..... <input type="checkbox"/> WHY: .....                                                                                                                                                                                                                                                                                                                                                                                                                                                                                                                                                                                                                                                                                                                                                                              |  |
| <b>MOLNUPIRAVIR THERAPY - side effects:</b>         | <div style="display: flex; justify-content: space-between;"> <div style="width: 48%;"> <input type="checkbox"/> diarrhea<br/> <input type="checkbox"/> nausea<br/> <input type="checkbox"/> vomiting<br/> <input type="checkbox"/> dizziness         </div> <div style="width: 48%;"> <input type="checkbox"/> headaches<br/> <input type="checkbox"/> rash<br/> <input type="checkbox"/> other (please describe):<br/>           .....         </div> </div>                                                                                                                                                                                                                                                                                                                                                                                                                                                                                                                                                            |  |
